# Supplementary material
Source: PubMed Central journal article supplement (PMC6691507)
Supplement: NIHMS1041290-supplement-Supporting.pdf [file NIHMS1041290-supplement-Supporting.pdf]

**Supporting Information for:**

**Calcium Regulates the Nuclear Localization of Protein Arginine Deiminase 2**

Li Zheng<sup>1,2</sup>, Mitesh Nagar,<sup>1,2</sup> Aaron J. Maurais<sup>3</sup>, Daniel J. Slade<sup>4</sup>, Sangram S. Parelkar<sup>1</sup>,  
Scott A. Coonrod<sup>5</sup>, Eranthie Weerapana<sup>3</sup> and Paul R. Thompson\*<sup>1,2,6</sup>

<sup>1</sup>Department of Biochemistry and Pharmacology, University of Massachusetts Medical School, Worcester, Massachusetts 01605, United States

<sup>2</sup>Program in Chemical Biology, University of Massachusetts Medical School, 364 Plantation Street, Worcester, Massachusetts 01605, United States

<sup>3</sup>Department of Chemistry, Boston College, Chestnut Hill, MA 02467

<sup>4</sup>Department of Biochemistry, Virginia Polytechnic Institute and State University, Blacksburg, Virginia 24061, United States

<sup>5</sup>James A. Baker Institute for Animal Health, College of Veterinary Medicine, Cornell University, Ithaca, New York, United States of America

<sup>6</sup>Lead Contact

\* Correspondence: paul.thompson@umassmed.edu.

**Running title: Nuclear Localization of PAD2**

**Table S1: Materials**

| REAGENT or RESOURCE                                  | SOURCE      | IDENTIFIER                            |
|------------------------------------------------------|-------------|---------------------------------------|
| <b>Antibodies</b>                                    |             |                                       |
| Anti-SOD4                                            | Abcam       | cat# ab137131                         |
| Anti-histone H3                                      | Abcam       | cat# 10799<br>RRID: AB_470239         |
| Anti-myc                                             | Sigma       | cat# C3956;<br>RRID: AB_439680        |
| Goat anti-rabbit IgG Licor IRDye 800CW               | Licor       | cat# 925-32211;<br>RRID:AB_2651127    |
| Goat anti-rabbit IgG Licor IRDye 680RD               | Licor       | cat# 925-68071;<br>RRID:AB_2721181    |
| Streptavidin Licor IRDye 800CW                       | Licor       | cat# 925-32230                        |
| Streptavidin Licor IRDye680RD                        | Licor       | cat# 926-68079                        |
| Anti RAN                                             | Proteintech | cat# 10469-1-AP                       |
| Anti ANXA5                                           | Proteintech | cat# 66245-1-1g                       |
| Anti rabbit PAD2                                     | Proteintech | cat# 12110-1-AP                       |
| Anti mouse PAD2                                      | Proteintech | cat# 66386-1-1g                       |
| <b>Chemicals, Peptides, and Recombinant Proteins</b> |             |                                       |
| Protein A/G plus agarose beads                       | Santa Cruz  | cat# Sc-2003;<br>RRID:<br>AB_10201400 |
| BAEE                                                 | Sigma       | cat# B4500                            |
| L-citrulline                                         | Sigma       | cat# c7629                            |
| CaCl <sub>2</sub>                                    | Sigma       | cat# c1016                            |
| Fetal bovine serum (FBS)                             | Sigma       | cat# F4135-500ML                      |
| Formic acid                                          | Sigma       | cat# 06473                            |
| Ammonium bicarbonate                                 | Sigma       | cat# 09830-500G                       |

|                                                                      |                                |                |
|----------------------------------------------------------------------|--------------------------------|----------------|
| L-arginine (R0)                                                      | Sigma                          | cat# A5006     |
| L-lysine (K0)                                                        | Sigma                          | cat# L5501     |
| Ionomycin                                                            | Millipore Sigma                | cat# 407953    |
| DMEM                                                                 | Corning                        | cat# 10-013-cv |
| Trypsin                                                              | Corning                        | cat# 25-053-CI |
| Lipofectamine 2000                                                   | ThermoFisher                   | cat# 11668019  |
| Protease inhibitor tablets                                           | ThermoFisher                   | cat# A32963    |
| [ <sup>13</sup> C/ <sup>15</sup> N]-L-arginine (R10)                 | Cambridge Isotope Laboratories | cat# CNLM 539  |
| [ <sup>13</sup> C/ <sup>15</sup> N]-L-lysine (K8)                    | Cambridge Isotope Laboratories | cat# CNLM 291  |
| Dialyzed FBS                                                         | Atlanta Biologicals            | cat# S12850    |
| <b>Commercial Assays</b>                                             |                                |                |
| DC Protein Assay kit                                                 | BioRAD                         | cat# 5000111   |
| <b>Cell Lines</b>                                                    |                                |                |
| HEK293T                                                              | ATCC                           | CRL-3216       |
| HEK293                                                               | ATCC                           | CRL-1573       |
| <b>Oligonucleotides</b>                                              |                                |                |
| Primers for pETRan forward:<br>GACACAGCCGGCCAGGAGAAATTCGGT<br>GGACTG | IDT                            |                |
| Primers for pETRan reverse:<br>CAGTCCACCGAATTTCTCCTGGCCGGCT<br>GTGTC | IDT                            |                |
| Primers for pETRan T24N forward:<br>ACTGGAAAAACACCTTCGTGAAACG        | IDT                            |                |
| Primers for pETRan T24N reverse:<br>ACGTTTCACGAAGGTGTTTTTCCAGT       | IDT                            |                |

|                                     |                           |            |
|-------------------------------------|---------------------------|------------|
| Primers for BioID2PAD2 forward:     | IDT                       |            |
| GAGTCGAATTCAGGGCACCATGTGCCAC<br>CAC |                           |            |
| Primers for BioID2PAD2 reverse:     | IDT                       |            |
| GACGACGACCTCGAGATGCTGCGCGAG         |                           |            |
| <b>Recombinant DNA</b>              |                           |            |
| pET-Ran(Q69L)                       | Addgene                   | cat# 42048 |
| myc-BioID2-MCS                      | Addgene                   | cat# 74223 |
| pET16B PAD2                         | (Dreyton et al.,<br>2014) | N/A        |

---

**Table S3. PAD2 Calcium Dependence with the Substrate BAEE in presence of Ran and ANXA5.**

---

|                                    | $k_{\text{cat}}$ ( $\text{s}^{-1}$ ) | n              | $K_{0.5}$ (mM)   |
|------------------------------------|--------------------------------------|----------------|------------------|
| PAD2                               | $2.6 \pm 0.05$                       | $3.1 \pm 0.4$  | $0.15 \pm 0.01$  |
| PAD2 + ANXA5                       | $2.3 \pm 0.04$                       | $2.8 \pm 0.2$  | $0.16 \pm 0.007$ |
| PAD2 + Ran                         | $2.5 \pm 0.1$                        | $3.0 \pm 0.7$  | $0.16 \pm 0.02$  |
| PAD2 + Binding buffer <sup>a</sup> | $5.0 \pm 0.2$                        | $2.2 \pm 0.39$ | $0.22 \pm 0.02$  |
| PAD2 + GDP                         | $5.1 \pm 0.05$                       | $3.5 \pm 0.27$ | $0.21 \pm 0.005$ |
| PAD2 + GTP                         | $4.3 \pm 0.2$                        | $4.2 \pm 2.0$  | $0.20 \pm 0.03$  |
| PAD2 + Ran Q69L + GTP              | $5.5 \pm 0.1$                        | $3.3 \pm 0.3$  | $0.43 \pm 0.01$  |
| PAD2 + Ran T24N + GDP              | $5.5 \pm 0.04$                       | $6.9 \pm 3.4$  | $0.22 \pm 0.01$  |

---

<sup>a</sup> Binding buffer: 20 mM Tris-HCl pH 8.0, 50 mM NaCl, 2.5 mM MgCl<sub>2</sub>, 0.5% NP-40, 1% BSA and 10% (v/v) glycerol). The experiment was carried out in duplicate. Data are represented as mean  $\pm$  SEM.

---

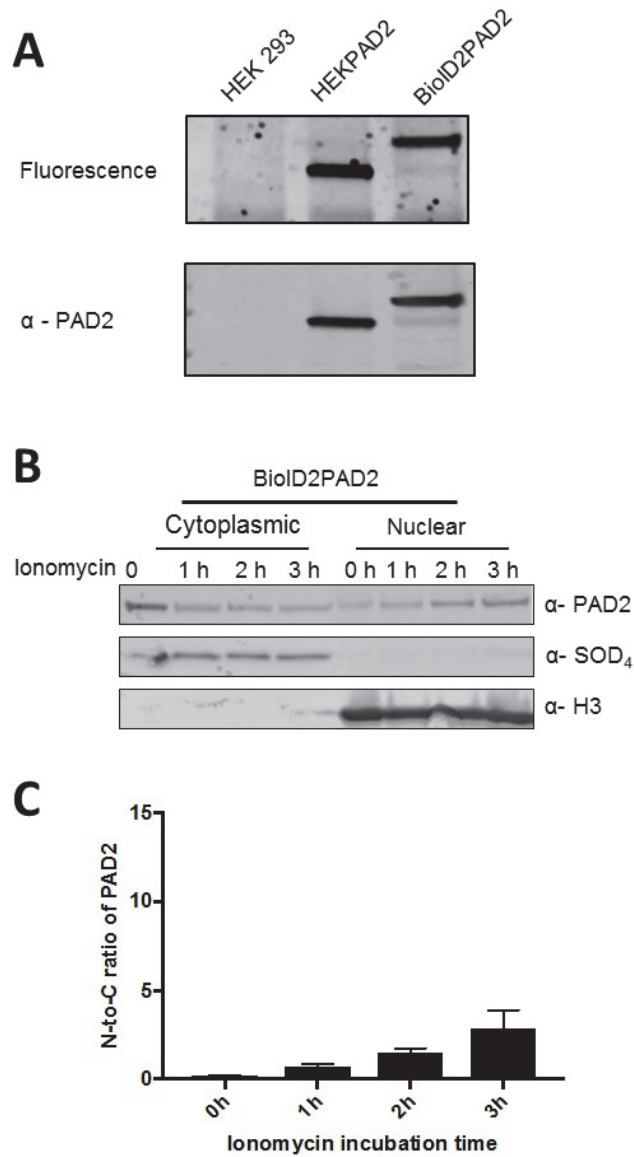

**Figure S1. BioID2PAD2 functions similarly to wild type PAD2.** (A) RIBFA labeling shows BioID2PAD2 has a comparative activity with wild type PAD2. Equal protein amount was confirmed by western blotting. (B) HEK293 BioID2PAD2 cellular proteins were separated by fractionation methods and examined by western blot. Cleanliness of fractionation was determined with antibodies for Histone H3 (nuclear) and SOD4 (cytoplasmic) protein. (C) The ratio of normalized density of BioID2PAD2 levels in nucleus over those in the cytoplasm is shown on the left of the corresponding western blots (n = 3).

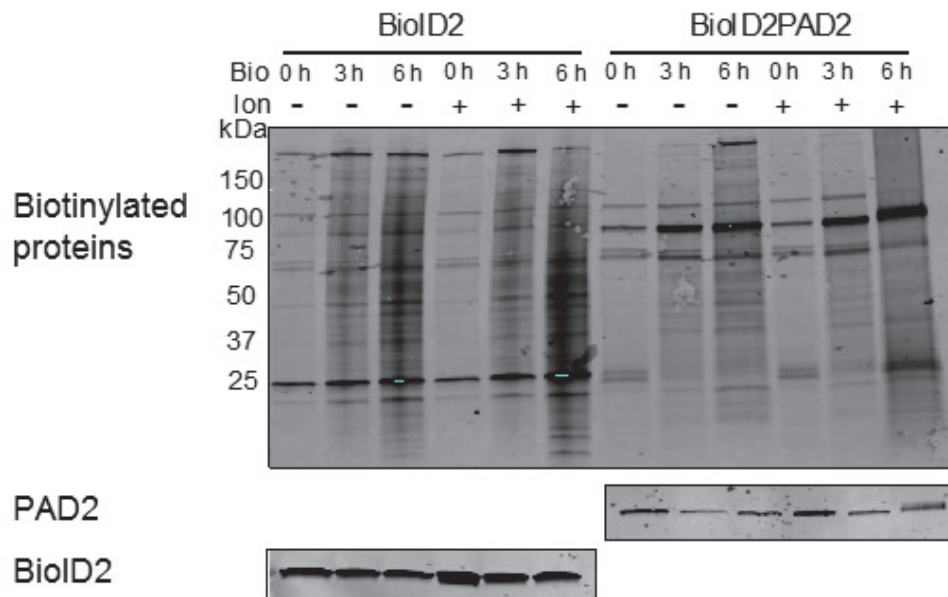

**Figure S2. BioID2PAD2 biotinylates a distinct set of proteins in a time- and ionomycin-dependent manner.** BioID2 and BioID2PAD2 expressing HEK293 cells were provided with 50  $\mu$ M biotin for various times plus or minus ionomycin. Biotinylation levels were then assayed by Western blotting. The levels of PAD2 and BioID2 are similar for all conditions (lower panel), while the extent of biotinylation increases with duration of biotin supplementation.

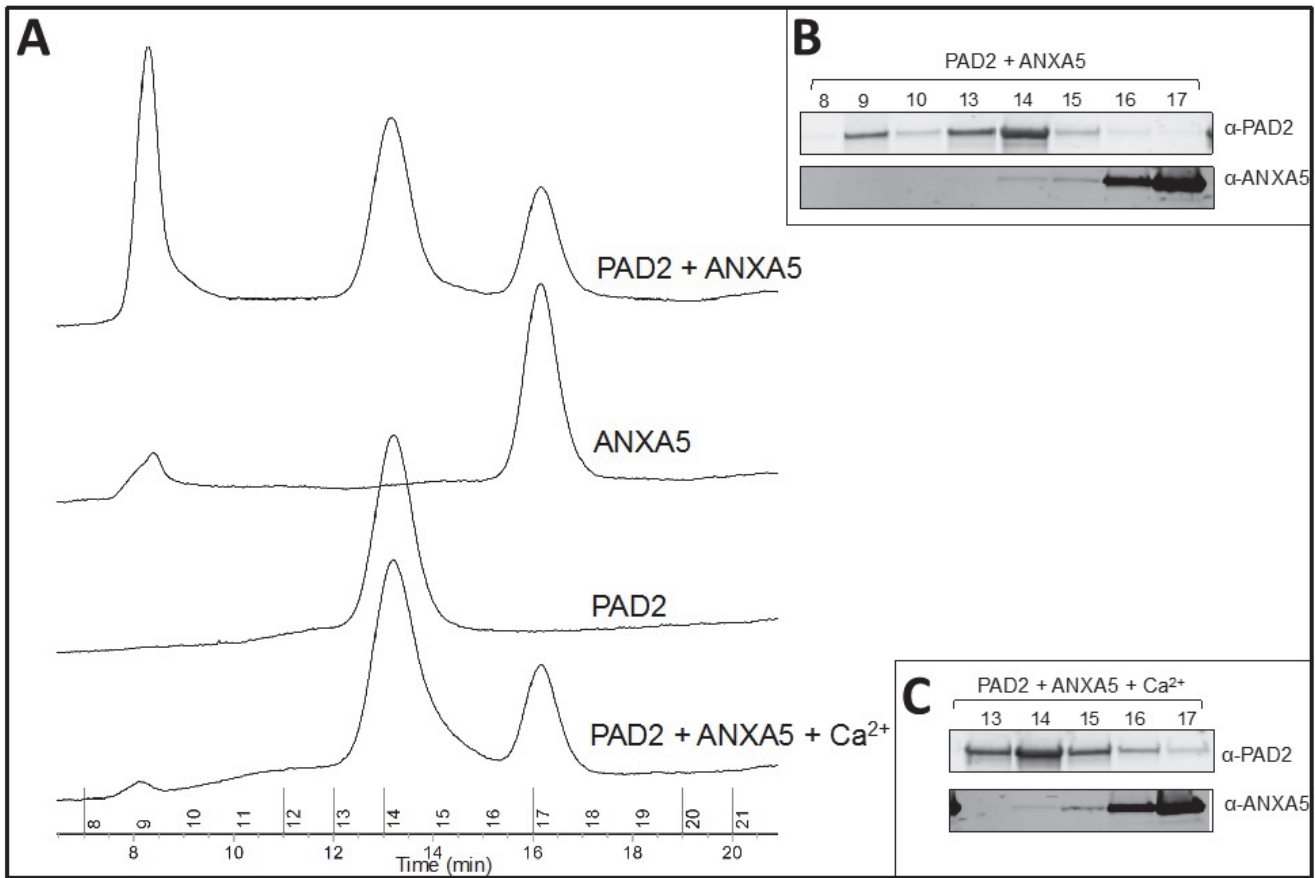

**Figure S3. PAD2 quaternary structure changes upon interaction of ANXA5.** (A) SEC spectra of PAD2/ANXA5 with or without calcium. Western blot shows proteins in individual fractions of each peak from top spectrum (B) and bottom spectrum (C).



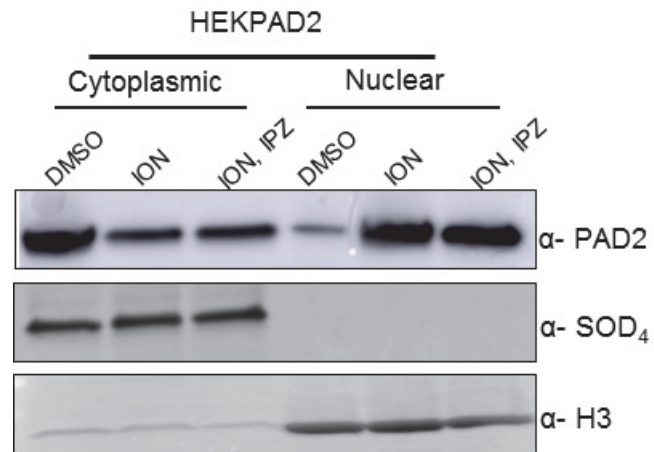

**Figure S4. Importazole does not inhibit PAD2 nuclear import.** Cellular fractionation of HEKPAD2 cells supplemented with DMSO, ionomycin (ION), or importazole (IPZ).
